# Supplementary material for: Long-Term Exposure to Glucose and Lipids Inhibits Glucose-Induced Insulin Secretion Downstream of Granule Fusion With Plasma Membrane
Source: Oxford University Press journal article supplement (doi:10.2337/db06-1150), 2007-06-27
Supplement: db061150onlineappendix.doc [file db061150onlineappendix.doc]

Olofsson et al, 2007

Supplementary online information

**Methods**

**RESEARCH DESIGN AND METHODS**

**Preparation and culture of islets and cells.** Pancreatic islets were isolated from female NMRI mice by collagenase P digestion (Roche, Bromma, Sweden). Palmitate and oleate (Sigma) were prepared in a solutions bound to fatty acid-free bovine serum albumin (BSA; Roche) as outlined elsewhere. Islets were cultured in RPMI 1640 (SVA, Uppsala, Sweden) together with 0.5mM palmitate or oleate in the presence of 1% BSA for ~72 hours. The resulting free FFA concentration were estimated to be 26 nM and 47 nM for palmitate and oleate, respectively. Control islets were cultured in the presence of 1% BSA alone. The medium was supplemented with 5% calf serum, 100 U/ml penicillin and 10 μg/ml streptomycin (all from Life Technologies, Täby, Sweden) and 4.5 or 15 mM glucose. Single β-cells were prepared and identifed as previously described (1) and continuously cultured under the same conditions as the islets.

Some experiments were performed on islets isolated from mice fed a high-fat diet. For these experiments, C57BL/6J (BMSU, Oxford University) mice were given a high fat diet (40% fat; Special Diets Services, UK) or appropriate control diet (5% fat) for 15 weeks. Islets from high fat fed mice were isolated at 20 weeks of age and used within 24h for measurements of hormone release and [Ca2+]i.

**Electrophysiology.** Whole-cell currents and exocytosis were recorded using an EPC-9 patch-clamp amplifier (HEKA Electronics, Lambrecht/Pfalz, Germany) and Pulse software (version 8.50). The experimental procedures were those previously reported (1). Ca2+ currents and exocytosis (monitored as increases in cell capacitance) were measured in the standard whole-cell configuration of the patch clamp technique. The extracellular medium contained (mM) 118 NaCl, 20 TEA-Cl (tetraethylammonium chloride), 5.6 KCl, 2.6 CaCl2, 1.2 MgCl2, 5 HEPES (pH 7.4 with NaOH) and 5 mM glucose. The pipette solution contained (mM) 125 Csglutamate, 10 CsCl, 10 NaCl, 1 MgCl2, and 5 HEPES (pH 7.15 with CsOH), 0.05 EGTA; 3 Mg-ATP, 0.1 cAMP.

KATP-channel activity was measured as slope conductance in the perforated-patch configuration. Cells were initially held at -70mV and currents were elicited by a 200 ms voltage-clamp pulse ramping the membrane potential between -110 and 0mV applied every 3 s. The sampling frequency was 20kHz. Slope conductance was analyzed over the linear part of the current-voltage relationship between -100mV and -50mV. The extracellular solution utilised in these experiments consisted of (mM)138 NaCl, 5.6 KCl, 2.6 CaCl2, 1.2 MgCl2, 5 HEPES (pH 7.4 with NaOH). Glucose was added at the concentrations indicated in the legends. The pipette solution consisted of (mM) 76 K2SO4, 10 KCl, 10 NaCl, 1 MgCl2, 5HEPES and 0.05 EGTA (pH 7.15 with KOH). The membrane potential was recorded in the same cells by switching the amplifier into the current-clamp mode. Only experiments with stable access resistance and small leak currents (<25pA) were used. The seal resistance was typically >1GΩ. The temperature was held at +32oC in all electrophysiological measurements.

**Measurements of [Ca2+]i.** Changes in [Ca2+]i were recorded in intact islets using a microfluorimetry system (D104, PTI, Monmouth Junction, N.J., USA) as previously described (1). The chamber was continuously superfused with a solution containing (mM) 140 NaCl, 3.6 KCl, 2 NaHCO3, 0.5 NaH2PO4, 0.5 MgSO4, 5 HEPES (pH 7.4 with NaOH), 2.6 CaCl2 and glucose as indicated. When stimulation involved elevation of the extracellular KCl concentration, the amount of NaCl was correspondingly reduced to maintain iso-osmolarity. The measurements were carried out at 32oC.

**Measurements of hormone release.** Insulin release was studied using intact islets and a Krebs-Ringer bicarbonate solution as described elsewhere (1). Each incubation vial was gassed with 95% O2 and 5% CO2 to obtain constant pH and oxygenation. After 60 min of incubation, aliquots of medium were removed for assay of insulin concentrations in the incubation media by radioimmunoassay (2). Tolbutamide (Sigma) and glucose was included as indicated in legends.

### ATP measurements. Batches of six islets were incubated at 37°C for 1 hr in 50 μl KRB solution containing 2 mg/ml BSA and various concentrations of glucose. After this time, 25 μl of ice-cold 10% perchloric acid was added and islets were disrupted by vortexing for 10 s. Each glucose concentration was tested in five separate assays, and ATP was measured in duplicate in 10 μl aliquots from each assay, using a luciferin-luciferase bioluminescent assay (Sigma St Louis, Missouri) and a TD20/20 luminometer (Turner Designs, Sunnyvale, California). Protein content was measured the DC protein assay kit (BioRad, Hercules, California).

**Electron microscopy and analysis of electron micrographs.** Pancreatic islets were cultured as described and fixed in 2.5% glutaraldehyde (Merck, Stockholm, Sweden) for 1h at 4°C. Islets were subsequently treated with 1% osmium tetroxide, dehydrated and embedded in Durcupan (Sigma, Sweden) before being cut into ultrathin 70-90nm sections using an LKB MK III Ultratome (Leica, Vienna, Austria). The sections were placed on Cu-grids and contrasted with uranyl acetate and lead citrate before examined in a JEM 1230 electron microscope (JEOL-USA. Inc., MA, USA). The electron micrographs were analyzed as described (Olofsson et al 2002) using Scion image (NIH) and an in-house MatLab-program. The diameter of the dense-cores was estimated using the same analysing method as for granular diameter.

**RNA isolation, reverse transcription and quantitative RT-PCR.** *RNA isolation:* Intact islets were collected, lysed and homogenised according to the manufacturer's recommendations. Total RNA was isolated using RNeasy purification columns (Qiagen, Hilden, Germany) and was analyzed and quantified spectrophotometrically using the ND-1000 spectrophotometer (Nanodrop, Delaware, USA).

*Reverse transcription:* For each reaction, approximately 0.1μg purified RNA was mixed with 0.5 μg oligo(dT) (TAGC, Copenhagen, Denmark), 200ng random hexamer (TAGC) and dNTP (Sigma) to a final concentration of 250 μM, and incubated at 65ºC for 5 minutes. Buffer, DTT (Invitrogen) to a final concentration of 5 mM, 30 units Prime RNase inhibitor (Eppendorf) and 200 units SuperScript II (Invitrogen) was added and the mixture was placed on 42ºC for 2 hours. Inactivation was achieved by 15 minute incubation at 70ºC.

*Real-time PCR*: The ABI PRISM® 7900HT Sequence Detection System was used for real-time PCR measurements. Using NCBI reference sequences (RefSeq), primers were designed using the Primer3 primer design tool (3) (Table S1). 25μl reaction mixtures containing 1X PCR buffer (Sigma), 3mM MgCl2 (Sigma), 0.3mM dNTP (Sigma), 400nM primers, 1U JumpStart Taq polymerase (Sigma), 1X ROX reference dye (Invitrogen) and 0.5X SYBR Green I (Molecular Probes). The temperature program started with initial denaturation at 95ºC for 10 min after which assays were run for 45 cycles (15 sec at 95ºC, 30 sec at 60ºC and 30 sec at 74ºC). Recording of a product dissociation curve was achieved with a temperature ramp from 65 to 95ºC. Background reduction was carried out by subtracting the average fluorescence in cycles 3-15. Cycle threshold was fixed at 0.2 fluorescence units for all experiments. Transcript levels were normalised to the endogenous reference genes (ERG) Gapdh, Hprt and Rps29 as described (4).

Table S1

| Gene name | NCBI Gene ID | Forward primer (5’-3’) | Reverse primer (5’-3’) |
| --- | --- | --- | --- |
| Ins1 | 16333 | TAGTGACCAGCTATAATCAGAG | ACGCCAAGGTCTGAAGGTCC |
| Cacna1c | 12288 | GGCTCTTTTGATTGTGATGCT | CTCCCCTTCCGTGCTGTT |
| Gck | 103988 | GACCGGATGGTGGATGAG | AAAACGGGTCTCAAAAGCAC |
| Glut2 | 20526 | TCAACCAGCATTTTTCAGACAG | AGCACAAGTCCCACCGACA |
| Kcnj11 | 16514 | CCAAGCCCAAGTTTAGCATC | GCACCCCACCACTCTACATAC |
| Abcc8 | 20927 | ACTTTGCTGAAACCGTGGAA | AAGAGGGAGGCGATGTTGT |
| Cpt1 | 12894 | ATGACGGCTATGGTGTTTCC | TGTCTCAAGTGCTTCCCAAA |
| Hk1 | 15275 | GATTCAAAGCCACCGACTG | ATGGGGACAGAAGGAAATGA |
| Ucp2 | 22228 | CAGTTCTACACCAAGGGCTCA | GTATCTCCGACCACCACCAG |
| Rps29 | 20090 | GGAGTCACCCACGGAAGT | TCCATTCAAGGTCGCTTAGTC |
| Hprt | 15452 | AGCCCCAAAATGGTTAAGGT | CAAGGGCATATCCAACAACA |
| Gapdh | 407972 | AGCGAGACCCCACTAACATC | GGTTCACACCCATCACAAAC |
| Snap25a | 228645 | AGGCATGAACCATATCAACCA | GATTATTGCCCCAGGCTTTT |
| Casp3 | 12367 | GTACGGAGCTGGACTGTGG | TGCAAAGGGACTGGATGAA |
| Bax | 12028 | GTGGTTGCCCTCTTCTACTTTG | TGAGCGAGGCGGTGAG |
| Chgb | 12653 | CAAATGCCCTATCCAAGTCC | TCACCTTTGACCTCTTTTCCA |
| Stx1a | 20907 | CAGTGAGATCGAGACCAGACA | GCCCTCTCCACGTAGTCCA |
| Syt4l | 27359 | CCCTCCTTCAGCAGACACA | TTTGGCACTTCAAACAGCAC |

*Abbreviations used:* Cacna1c, α1C Ca2+ channel subunit; Cpt-1, carnitin palmitoyl transferase-1; Gck, glucokinase; Glut-2, glucose transporter-2; Hk1, hexokinase 1; Ins1, insulin gene 1, Kcnj11, Kir6.2 (KATP-channel subunit); Abcc8, Sur1 (KATP-channel subunit) and Ucp2, uncoupling protein; Gapdh, glyceraldehyde-3-phosphate dehydrogenase; Hprt, hypoxanthine guanine phosphoribosyl transferase 1; Rps29, ribosomal protein S29; Snap25a, synaptosomal-associated protein 25, isoform a; Casp3, caspase 3; Chgb, chromogranin B; Bax, Bcl2-associated X protein; Sytl4, synaptotagmin-like 4.

**Refererences**

1. Olofsson CS, Salehi A, Holm C, Rorsman P: Palmitate increases L-type Ca2+ currents and the size of the readily releasable granule pool in mouse pancreatic beta-cells. J Physiol 557:935-948, 2004

2. Heding LG: A simplified insulin radioimmunoassay method. In: Donato L, Milhaud G, Sirchis J (eds) Labelled proteins in tracer studies. (Proceedings Conference on problems connected with the preparation and use of labelled proteins in tracer studies, sponsored by the Medical Clinic, Nuclear Medicine Center of the University of Pisa and Euratom, Pisa, 17-19 January 1966, pp 345-350, 1966

3. Rozen S, Skaletsky H: Primer3 on the WWW for general users and for biologist programmers. Methods Mol Biol 132:365-386, 2000

4. Vandesompele J, De Preter K, Pattyn F, Poppe B, Van Roy N, De Paepe A, Speleman F: Accurate normalization of real-time quantitative RT-PCR data by geometric averaging of multiple internal control genes. Genome Biol 3:RESEARCH0034, 2002
